# Supplementary material for: Comparative transcriptome analyses of fruit development among pears, peaches, and strawberries provide new insights into single sigmoid patterns
Source: PubMed Central journal article supplement (PMC7060524; doi:10.1186/s12870-020-2317-6), 2020-03-06

A

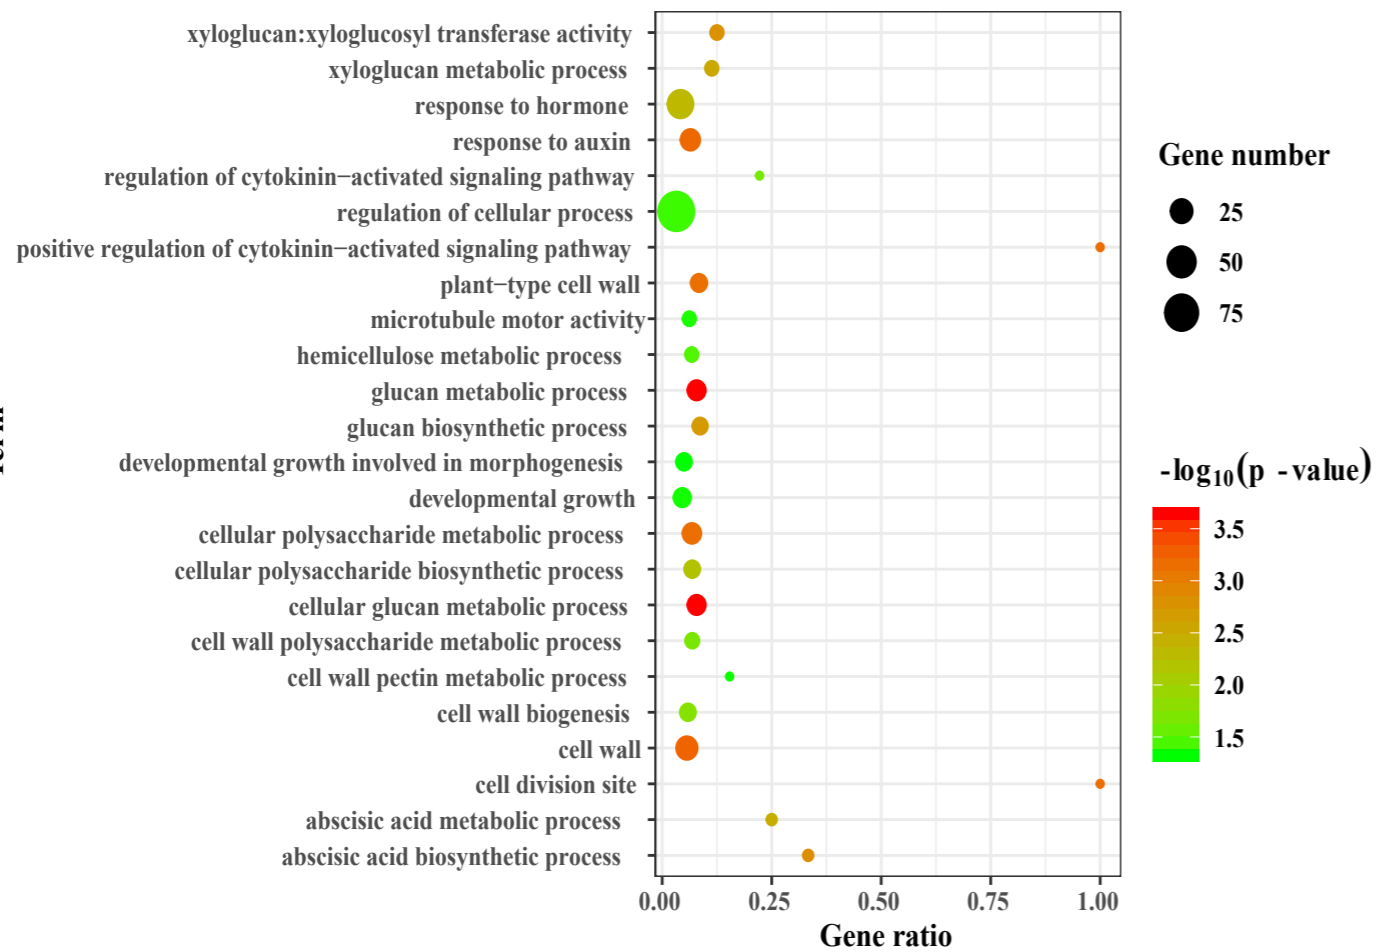

B

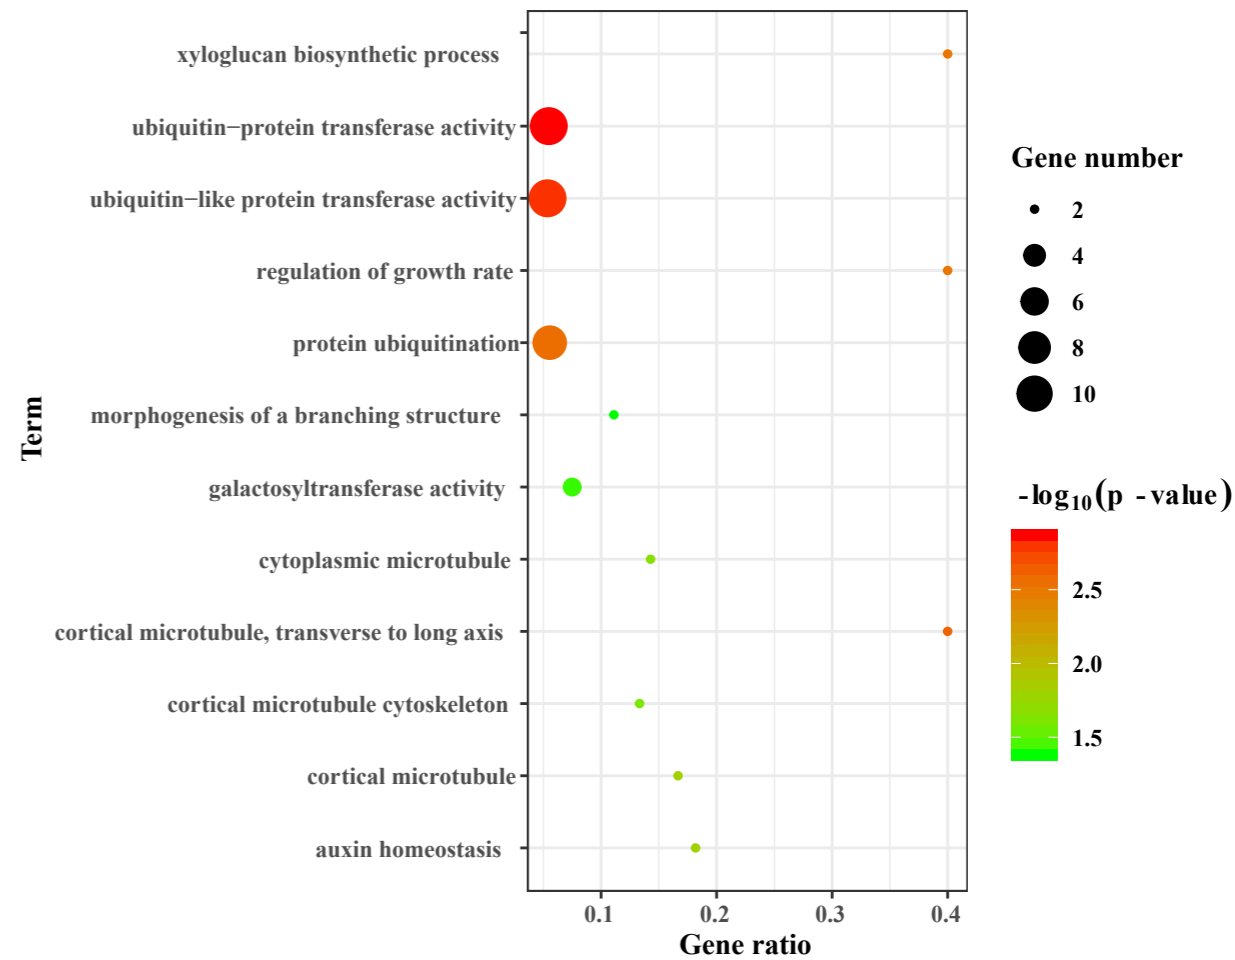

Supplement: 12870_2020_2317_MOESM3_ESM.pdf [file 12870_2020_2317_MOESM3_ESM.pdf]
